# Supplementary material for: Tofacitinib and faecal microbiota transplantation in treating checkpoint inhibitor-induced enterocolitis: case report
Source: PubMed Central journal article supplement — BMJ Open Gastroenterol. 2022 Dec 29;9(1):e000989. doi: 10.1136/bmjgast-2022-000989 (PMC9806036; doi:10.1136/bmjgast-2022-000989), 2022-12-29
Supplement: bmjgast-2022-000989supp001.pdf [file bmjgast-2022-000989supp001.pdf]

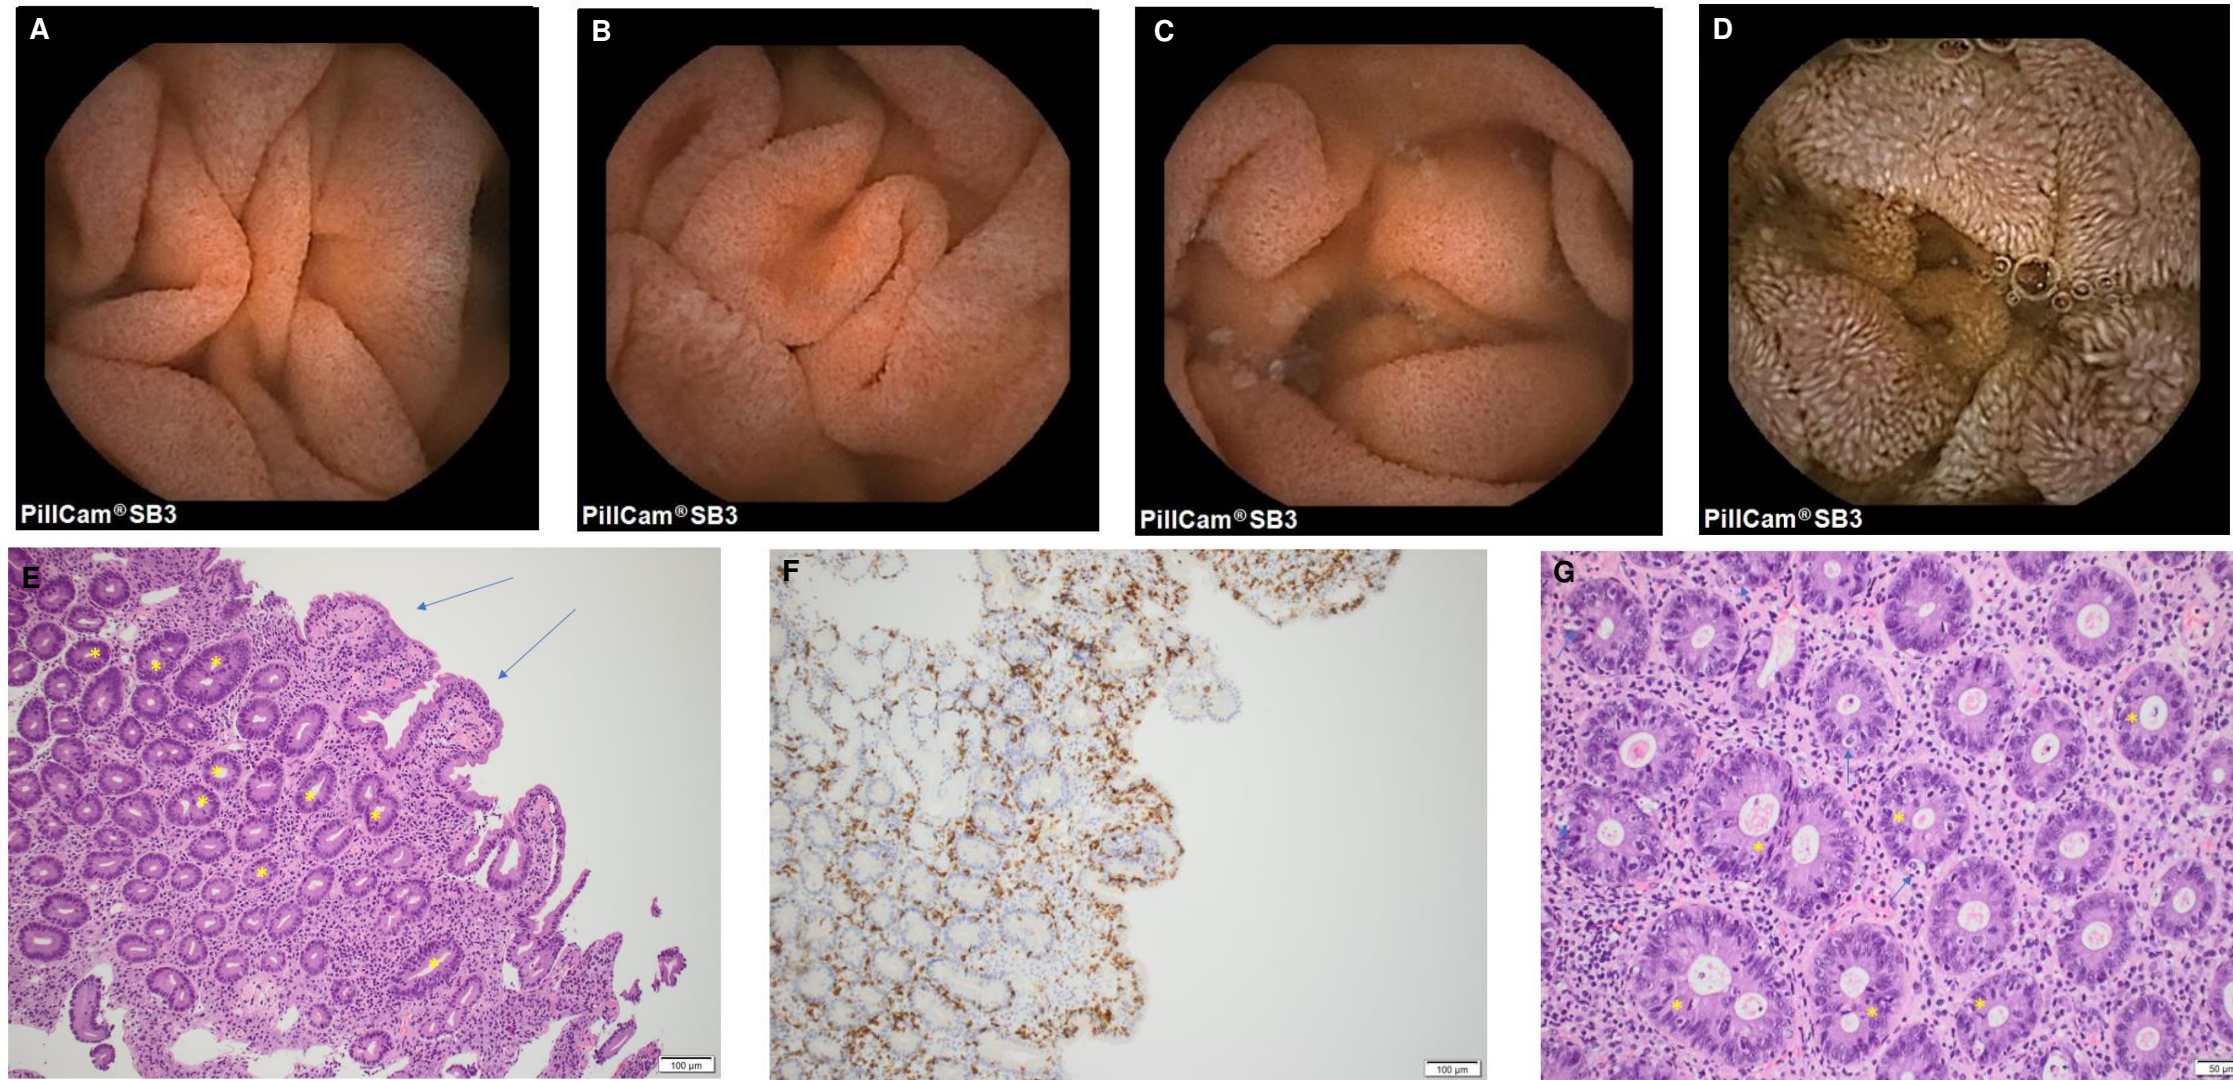

### Supplementary Figure S1. Capsule endoscopy and histology of the colon.

A-C: Pill Cam pictures (capsule endoscopy) showing enteritis with flattened villi in jejunum/ileum. D: Pill Cam pictures showing a normal capsule endoscopy (healthy patient).

In the duodenum, minor erosions, partial villous atrophy, increased number of lymphocytes, and cryptitis were observed. The colon surface was flattened without ulcerations. The colonic crypt architecture had widespread cryptitis, intraepithelial lymphocytes, and numerous crypt apoptosis. The lamina propria had increased cellularity of mixed inflammatory cells with lymphocyte infiltrates. E: Duodenitis induced by ICIs with villous atrophy (arrows) and intraepithelial lymphocytosis (stars), hematoxylin-eosin staining, x100. F: Duodenal intraepithelial lymphocytosis, CD3 immunostaining, x100. G: Colonic intraepithelial lymphocytosis (stars) and apoptosis (arrows) demonstrating colitis, hematoxylin-eosin staining, x200.
